# Supplementary material for: Pharmacokinetics and efficacy of topical inserts containing tenofovir alafenamide fumarate and elvitegravir administered rectally in macaques
Source: PubMed Central journal article supplement — eBioMedicine. 2022 Nov 5;86:104338. doi: 10.1016/j.ebiom.2022.104338 (PMC9643401; doi:10.1016/j.ebiom.2022.104338), 2022-11-05
Supplement: mmc1.pdf [file mmc1.pdf]

**Supplemental table 1. Simulated power to detect a shift (of any size) using the log-rank test under various scenarios.**

|                 | $\mu_1 = 10$              | $\mu_1 = 10$              | $\mu_1 = 10$              | $\mu_1 = 10$              | $\mu_1 = 9$               | $\mu_1 = 9$               | $\mu_1 = 5$               | $\mu_1 = 5$               | $\mu_1 = 4$               | $\mu_1 = 4$               |
|-----------------|---------------------------|---------------------------|---------------------------|---------------------------|---------------------------|---------------------------|---------------------------|---------------------------|---------------------------|---------------------------|
|                 | $\mu_2 = 12$              | $\mu_2 = 12$              | $\mu_2 = 13$              |
|                 | $\delta = 2$              | $\delta = 2$              | $\delta = 3$              | $\delta = 3$              | $\delta = 4$              | $\delta = 4$              | $\delta = 8$              | $\delta = 8$              | $\delta = 9$              | $\delta = 9$              |
|                 | $\sigma_1 = \sigma_2 = 1$ | $\sigma_1 = \sigma_2 = 2$ | $\sigma_1 = \sigma_2 = 1$ | $\sigma_1 = \sigma_2 = 2$ | $\sigma_1 = \sigma_2 = 1$ | $\sigma_1 = \sigma_2 = 2$ | $\sigma_1 = \sigma_2 = 4$ | $\sigma_1 = \sigma_2 = 5$ | $\sigma_1 = \sigma_2 = 4$ | $\sigma_1 = \sigma_2 = 5$ |
| $n_1 = n_2 = 6$ | 0.85                      | 0.35                      | 0.99                      | 0.64                      | 1.00                      | 0.86                      | 0.86                      | 0.70                      | 0.93                      | 0.79                      |
| $n_1 = n_2 = 7$ | 0.90                      | 0.40                      | 1.00                      | 0.71                      | 1.00                      | 0.92                      | 0.90                      | 0.77                      | 0.96                      | 0.85                      |
| $n_1 = n_2 = 8$ | 0.94                      | 0.45                      | 1.00                      | 0.78                      | 1.00                      | 0.93                      | 0.95                      | 0.81                      | 0.98                      | 0.89                      |
