# Supplementary figures and images for: Pharmacokinetics and efficacy of topical inserts containing tenofovir alafenamide fumarate and elvitegravir administered rectally in macaques
Source: PubMed Central journal article supplement — eBioMedicine. 2022 Nov 5;86:104338. doi: 10.1016/j.ebiom.2022.104338 (PMC9643401; doi:10.1016/j.ebiom.2022.104338), 2022-11-05

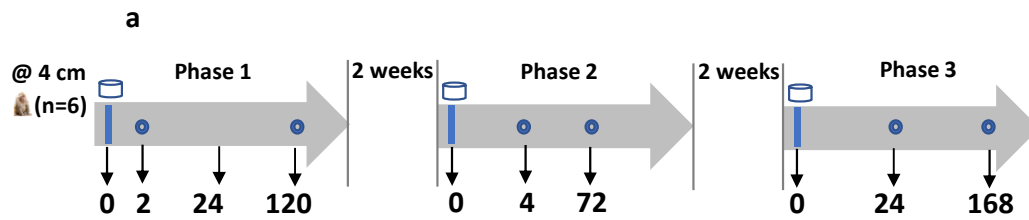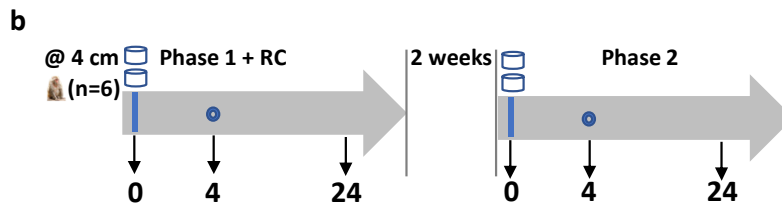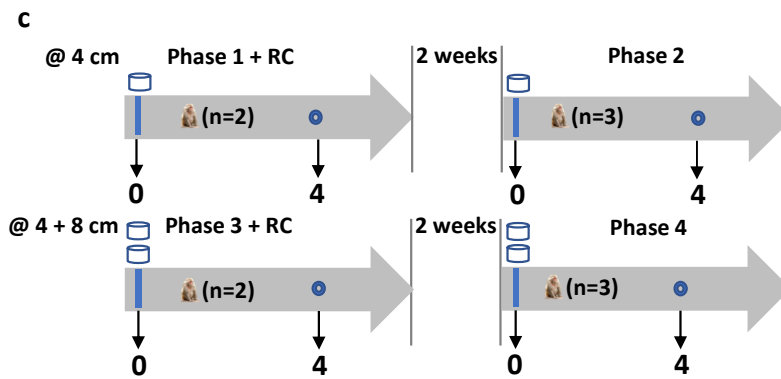

Supplement: mmc4.pdf [file mmc4.pdf]

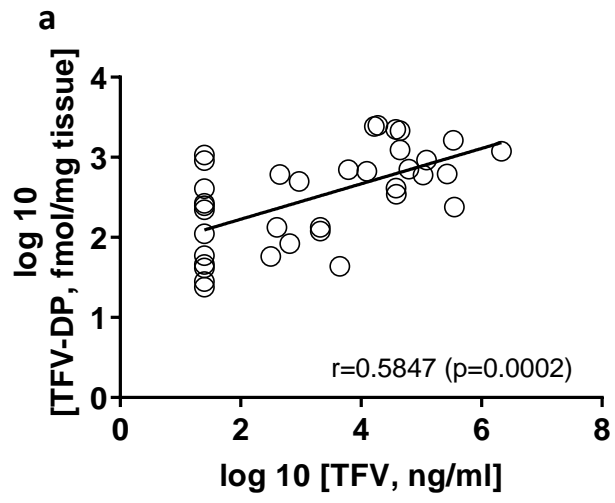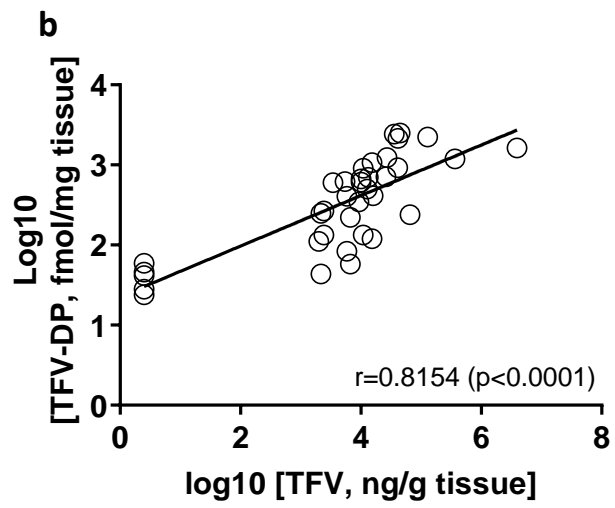

Supplement: mmc5.pdf [file mmc5.pdf]

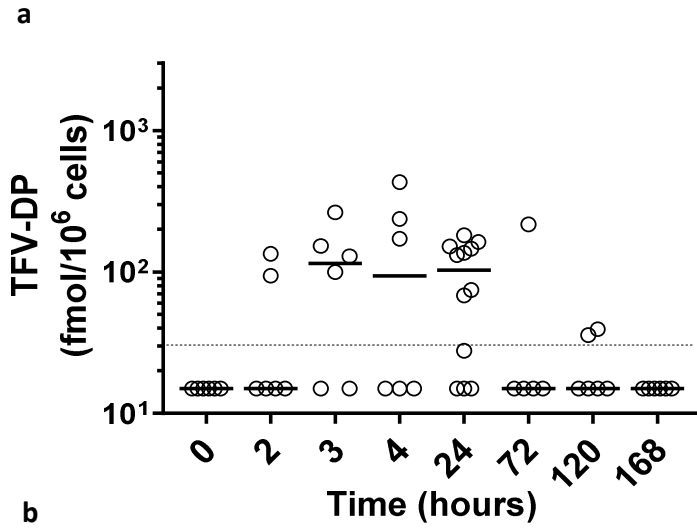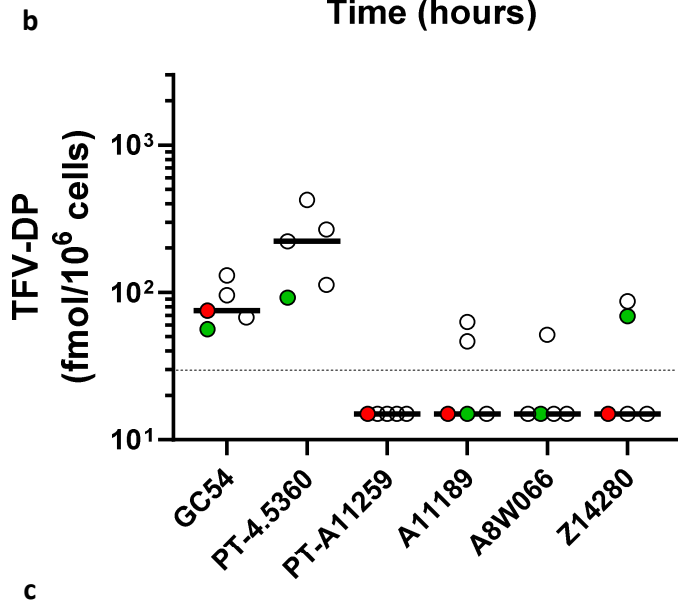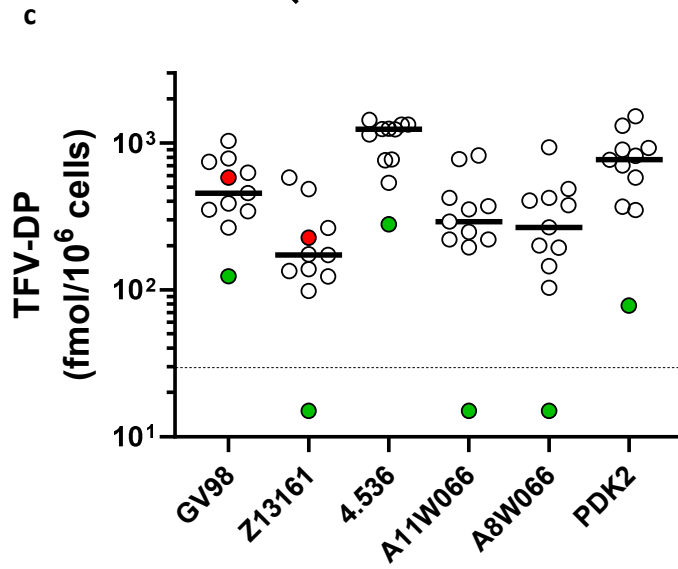

Supplement: mmc6.pdf [file mmc6.pdf]

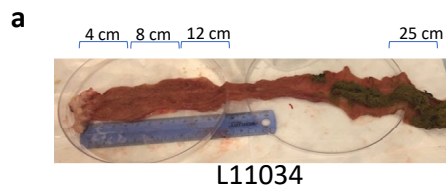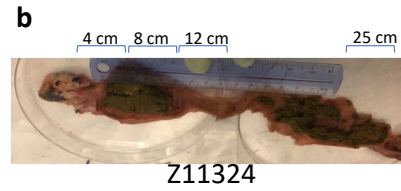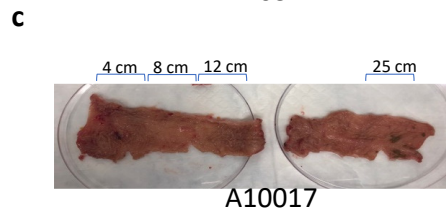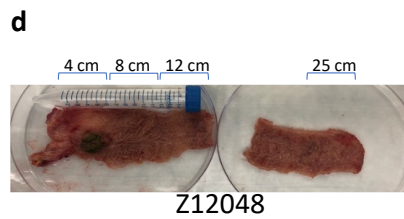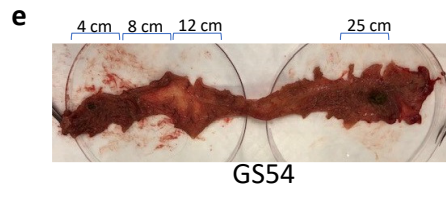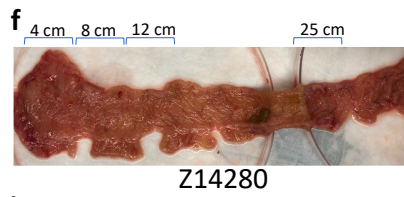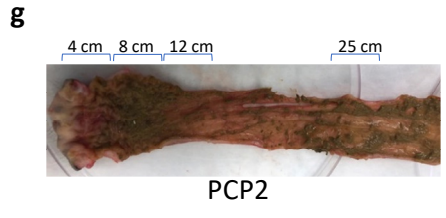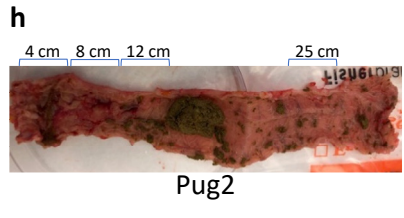

Supplement: mmc7.pdf [file mmc7.pdf]

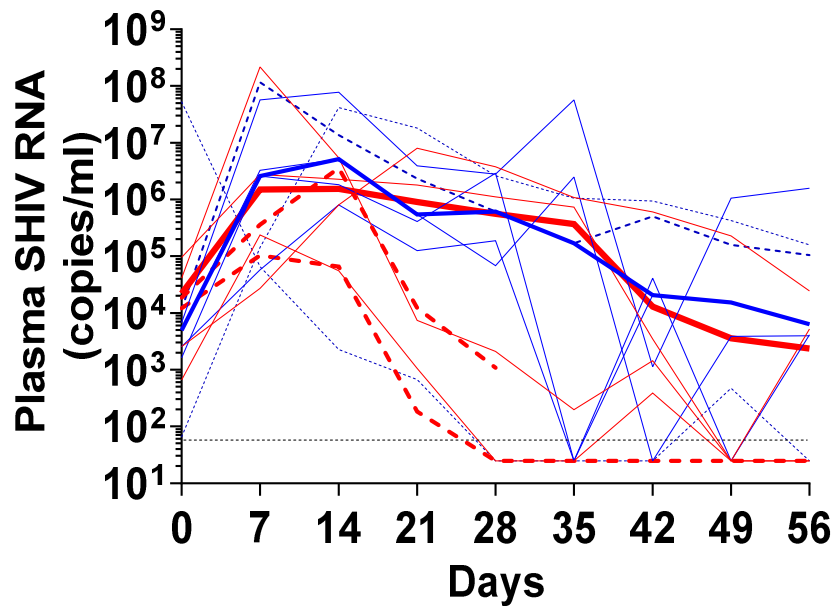

Supplement: mmc8.pdf [file mmc8.pdf]
